# Supplementary material for: Enhanced mechanical stability and sensitive swelling performance of chitosan/yeast hybrid hydrogel beads
Source: Royal Society of Chemistry journal article supplement (doi:10.1039/c5nj02404h), 2016-01-01
Supplement: c5nj02404h1.pdf [file c5nj02404h1.pdf]

## Supplementary Information

### **Enhanced Mechanical Stability and Sensitive Swelling Performance of Chitosan/yeast Hybrid Hydrogel Beads**

Diejing Feng<sup>a</sup>, Bo Bai<sup>\*b</sup>, Honglun Wang<sup>b</sup>, Yourui Suo<sup>b</sup>

<sup>a</sup> College of Environmental Science and Engineering, Chang'an University, Xi'an, 710054, P.R. China; <sup>b</sup> Key Laboratory of Tibetan Medicine Research, Northwest Institute of Plateau Biology, Chinese Academy of Sciences, Xining, 810001, P.R. China

Corresponding Author: Bo Bai

Email: baibochina@163.com

Fax: +86 298 233 9961

Tel: +86 298 233 0952



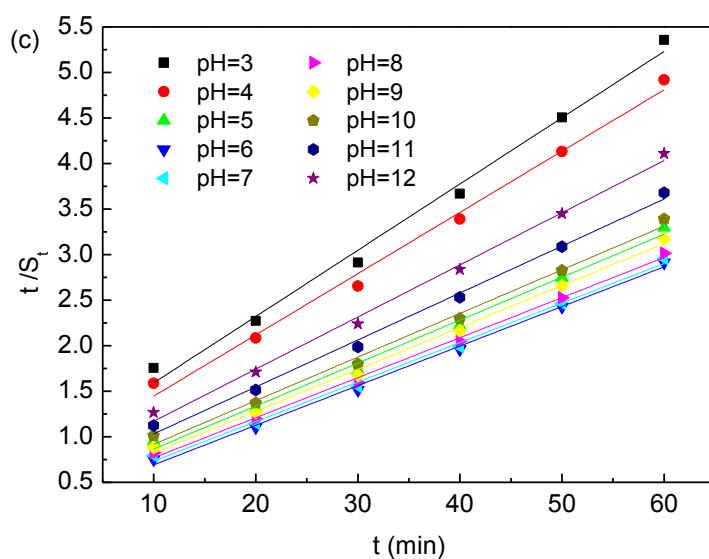

**Figure S1.** (a) Swelling behaviors of chitosan/yeast hybrid hydrogel beads with 40 wt% yeast contents in pH 3-12 solutions, (b) pseudo-first-order kinetic model, (c) pseudo-second-order kinetic model.

As can be seen, the time-dependent swelling behaviour of chitosan/yeast hybrid hydrogel beads with 40 wt% yeast content observed in pH 3-12 solutions is similar to that in distilled water presented in Figure 4. Specifically, a steep increase of  $S_e$  was observed in the first 30 min, and then followed a gentle stage until reached an equilibrium state. In comparison, the values of the correlation coefficient ( $R^2$ ) of pseudo-second-order kinetic model are much closer to 1.0, and the values of chi square or the residual sum of squares ( $\chi^2$ ) are much closer to 0 than pseudo-first-order kinetic model. It seemed that the swelling process of chitosan/yeast hybrid hydrogel beads obeyed pseudo-second-order kinetic model better than pseudo-first-order kinetic model. Furthermore, the swelling kinetics is dependent on the pH values of swelling medium. With altering the pH values of swelling medium, the  $S_e$  values obtained in the range of 6~7 were higher than any other pH values. This was due to the quaternisation of  $-\text{NH}_2$  groups derived from chitosan after the external pH value exceeding its  $pK_a$  (approximately 6.3), and thus the electronic repulsion between  $-\text{NH}_3^+$  groups contributed the network of chitosan/yeast hybrid hydrogel beads to relaxing more.

**Table S1.** Kinetic parameters for the water absorbency of chitosan/yeast hybrid hydrogel beads (40 wt%) in various pH media.

| pH | $S_{e,exp}$<br>(g/g) | Pseudo-first-order kinetic model |                               |        |          | Pseudo-second-order kinetic model |                    |        |          |
|----|----------------------|----------------------------------|-------------------------------|--------|----------|-----------------------------------|--------------------|--------|----------|
|    |                      | $S_{e,cal}$<br>(g/g)             | $K_1$<br>(min <sup>-1</sup> ) | $R^2$  | $\chi^2$ | $S_{e,cal}$<br>(g/g)              | $K_2$<br>(g/g min) | $R^2$  | $\chi^2$ |
| 3  | 11.2                 | 13.5887                          | 0.0951                        | 0.9912 | 0.1117   | 13.7438                           | 0.0061             | 0.9901 | 0.0739   |
| 4  | 12.2                 | 13.7786                          | 0.0937                        | 0.9913 | 0.0575   | 14.8721                           | 0.0058             | 0.9910 | 0.0572   |
| 5  | 18.2                 | 22.1746                          | 0.1117                        | 0.9814 | 0.1764   | 21.2089                           | 0.0056             | 0.9929 | 0.0223   |
| 6  | 20.6                 | 22.5440                          | 0.1148                        | 0.9953 | 0.0467   | 23.0044                           | 0.0073             | 0.9964 | 0.0097   |
| 7  | 20.3                 | 23.5162                          | 0.1128                        | 0.9830 | 0.1646   | 23.0468                           | 0.0063             | 0.9959 | 0.0110   |
| 8  | 19.9                 | 22.5860                          | 0.1041                        | 0.9930 | 0.1062   | 22.7531                           | 0.0058             | 0.9964 | 0.0098   |
| 9  | 18.9                 | 21.4085                          | 0.1034                        | 0.9935 | 0.0982   | 21.7202                           | 0.0059             | 0.9957 | 0.0129   |
| 10 | 17.7                 | 20.3455                          | 0.1021                        | 0.9912 | 0.0692   | 20.8768                           | 0.0052             | 0.9924 | 0.0247   |
| 11 | 16.3                 | 19.7440                          | 0.0986                        | 0.9802 | 0.2742   | 19.3949                           | 0.0051             | 0.9939 | 0.0226   |
| 12 | 14.6                 | 17.6621                          | 0.0960                        | 0.9771 | 0.3014   | 17.4703                           | 0.0054             | 0.9946 | 0.0247   |
